# Supplementary material
Source: PubMed Central journal article supplement (PMC3039076)
Supplement: NIHMS265473-supplement-1_si_001.pdf [file NIHMS265473-supplement-1_si_001.pdf]

## Supporting Information

### Increased *In Vivo* Glucose Recovery via Nitric Oxide Release

Authors: Scott P. Nichols<sup>\*</sup>, Nga N. Le<sup>†</sup>, Bruce Klitzman<sup>†</sup>, Mark H. Schoenfisch<sup>\*</sup>

<sup>\*</sup>Department of Chemistry, University of North Carolina at Chapel Hill, Chapel Hill, NC 27599

<sup>†</sup>Kenan Plastic Surgery Research Labs and Department of Biomedical Engineering, Duke University Medical Center, Durham, NC 27710

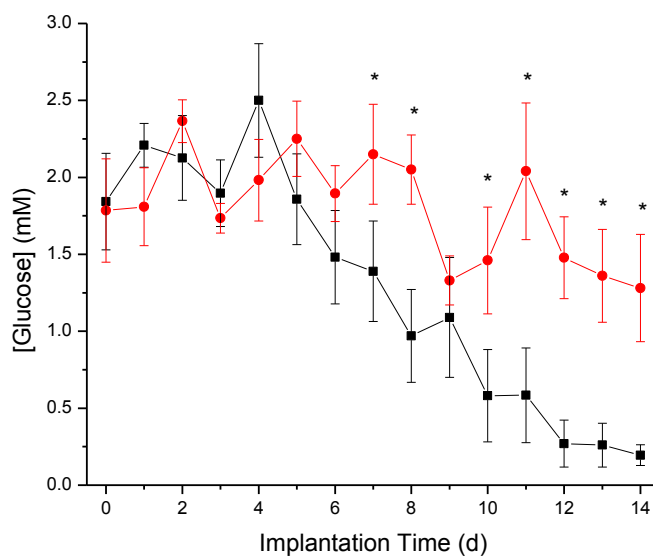

**Figure S1.** Actual glucose recovery as a function of implantation time for nitric oxide-releasing (filled, red) and control (empty, black) probes. Error bars are  $\pm$  standard error of the mean. Significant differences ( $p < 0.05$ ) between NO-releasing and controls are noted by \*.
